# Supplementary material for: Temporal Effects of Quercetin on Tight Junction Barrier Properties and Claudin Expression and Localization in MDCK II Cells
Source: MDPI journal article supplement (doi:10.3390/ijms20194889), 2019-10-02
Supplement: s1 [file s1]

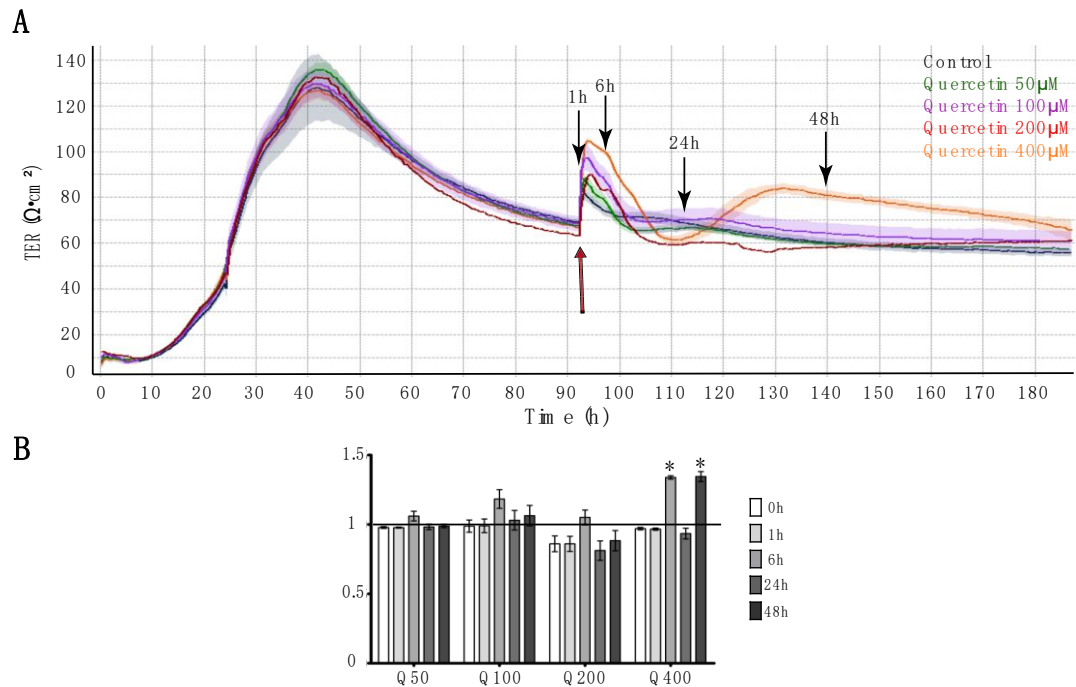

**Figure S1.** Quercetin dose response on TER. **(A)** Comparison of TER of control (black) versus cells treated with 50 $\mu\text{M}$  (green), 100 $\mu\text{M}$  (purple), 200 $\mu\text{M}$  (red) or 400 $\mu\text{M}$  of quercetin (orange). **(B)** Measurement of quercetin treated TER values relative to control cells at different time points and different treatment concentrations. The horizontal line delineates control level. \* $P < 0.05$ .

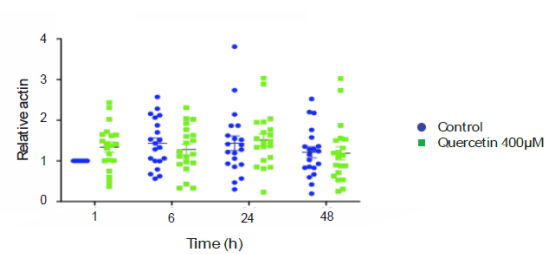

Densitometry of all actin bands used for normalization for control and quercetin treated cells. Each band is normalized to control actin at 1h for each of the blots. Two-way Anova and Sidak's multiple comparison test was performed and no significance was observed ( $P_{\text{int}}=0.32$ ;  $P_{\text{time}}=0.097$ ;  $P_{\text{treat}}=0.52$ ). Mean and SEM are plotted. Each dot corresponds to an independent experiment.
